# Supplementary material for: General Purpose Propofol Target Controlled Infusions Using the Marsh Model with Adjusted Body Weight
Source: Research Square preprint supplement (doi:10.21203/rs.3.rs-3296215/v1), 2023-08-28
Supplement: Supplementary file 1 [file 2c9b6faa93712d491fe5b9ac.docx]

Supplementary Materials

Index of files

**pdmarsh.m** - algorithm for calculating the adjusted body weight and induction bolus (assuming induction CeT of 4 mcg/mL) in MATLAB

peaking.m, pkmodel.m, regimetest.m and tci.m are MATLAB functions required to run pdmarsh.

**MATLABPtSim.csv** - result of MATLAB simulation for 2768 patient cohort with corresponding adjusted body weights (ABW), iBolus (Bolus) and performance errors (MDPE, MDAPE and maxAPE).

**PropofolDreams EleMarsh.xlsx** - spreadsheet for approximating the adjusted body weight and induction bolus derived from our algorithm (using linear regression).
