# Supplementary material for: General Purpose Propofol Target Controlled Infusions Using the Marsh Model with Adjusted Body Weight
Source: Research Square preprint supplement (doi:10.21203/rs.3.rs-3296215/v1), 2023-08-28
Supplement: Supplementary file 2 [file dbbfff4c4522d4937748fde7.docx]

**Table 1** Performance of the Marsh model using calculated adjusted body weight input (ABW) and induction bolus (iBolus) as compared to the Eleveld model for selected patient with extremes of body mass index (BMI) and age undergoing a hypothetical four-hour TCI with varying effect site targets as shown in Figure 1. Median performance error (MDPE), median (MDAPE) and maximum (MaxAPE) absolute performance errors.

| **Subjects** | **Weight**  **(kg)** | **Height**  **(m)** | **BMI**  **(kg.m-2)** | **Age**  **(years)** | **Sex** | **ABW**  **(kg)** | **iBolus**  **(mg)** | **MDPE** | **MDAPE** | **MaxAPE** |
| --- | --- | --- | --- | --- | --- | --- | --- | --- | --- | --- |
| 1 | 200 | 1.58 | 80 | 30 | M | 129 | 432 | 1.3% | 2.8% | 18.5% |
| 2 | 200 | 1.58 | 80 | 30 | F | 144 | 452 | 0.4% | 1.4% | 18.2% |
| 3 | 40 | 1.63 | 15 | 30 | M | 43 | 119 | 2.7% | 2.9% | 17.4% |
| 4 | 40 | 1.63 | 15 | 30 | F | 45 | 123 | -0.5% | 1.3% | 10.9% |
| 5 | 70 | 1.67 | 25 | 90 | M | 46 | 125 | -1.7% | 4.7% | 13.6% |
| 6 | 70 | 1.67 | 25 | 90 | F | 51 | 132 | -3.3% | 6.3% | 14.7% |
| 7 | 150 | 1.58 | 60 | 90 | M | 78 | 226 | -3.0% | 4.4% | 12.1% |
| 8 | 150 | 1.58 | 60 | 90 | F | 88 | 243 | -4.1% | 5.8% | 12.6% |
| 9 | 40 | 1.63 | 15 | 90 | M | 31 | 83 | -0.1% | 3.7% | 12.5% |
| 10 | 40 | 1.63 | 15 | 90 | F | 34 | 85 | -2.5% | 6.8% | 15.4% |
